# Supplementary material
Source: Springer Nature journal article supplement (https://www.springermedizin.de/resource/supplementary/13256_2009_1437_MOESM1_ESM.pdf/9648862)

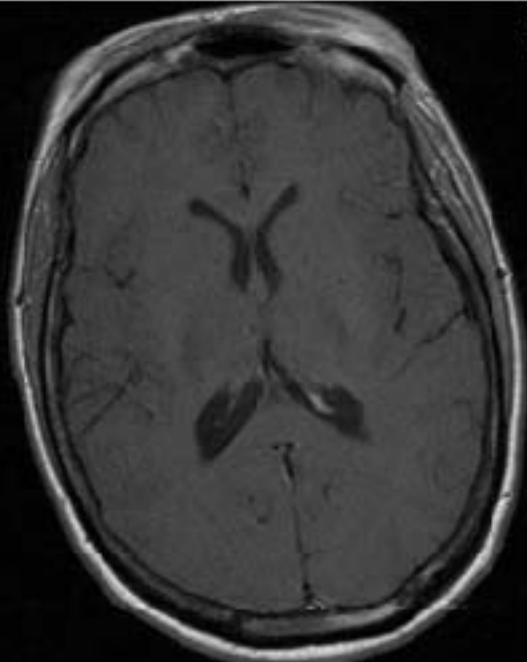

1  
1 mm

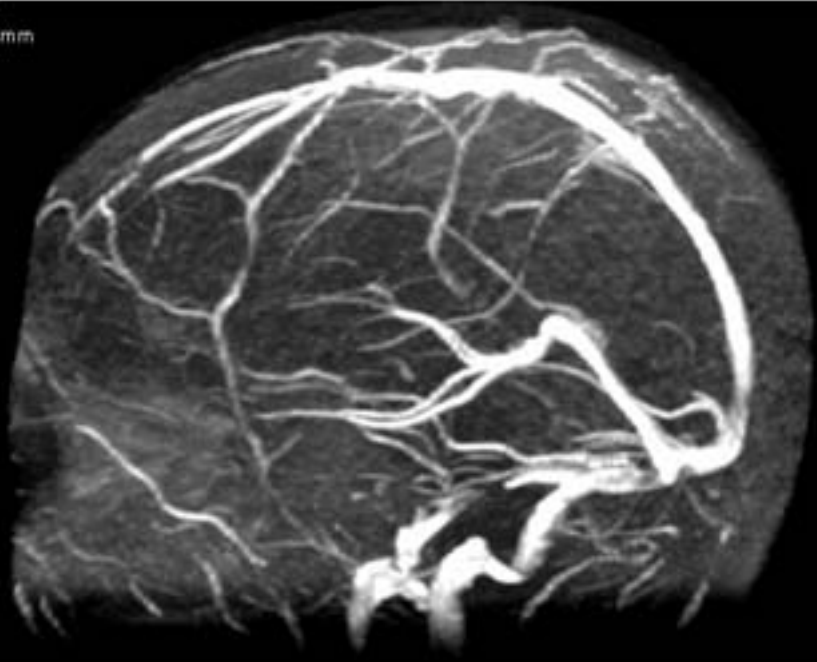

Supplement: MOESM1 [file 9648862]
